# Supplementary material for: Disruptions in Care for Medicare Beneficiaries With Severe Mental Illness During the COVID-19 Pandemic
Source: PubMed Central journal article supplement (PMC8800078; doi:10.1001/jamanetworkopen.2021.45677), 2022-01-28
Supplement: jamanetwopen-e2145677-s001.pdf [file jamanetwopen-e2145677-s001.pdf]

## Supplemental Online Content

Busch AB, Huskamp HA, Raja P, Rose S, Mehrotra A. Disruptions in care for Medicare beneficiaries with severe mental illness during the COVID-19 pandemic. *JAMA Netw Open*. 2022;5(1):e2145677. doi:10.1001/jamanetworkopen.2021.45677

**eFigure.** Flowchart for 2019 and 2020 Utilization Cohorts of Medicare Beneficiaries With Severe Mental Illness in Study

**eTable 1.** Outpatient Visit Codes

**eTable 2.** Substance Use Disorder, Medical Comorbidity, and Self-injury *ICD-10* Codes

**eTable 3.** Weekly Number and Percentage of Outpatient Mental Health Visits in 2020 Conducted by Telemedicine and by Type of Telemedicine

**eTable 4.** Outpatient Mental Health Utilization in 2019 vs 2020

**eTable 5.** Specific Types of Outpatient Mental Health Utilization in 2019 vs 2020

**eTable 6.** Mental Health Emergency Department Visit, Hospital Admission, or Oral Antipsychotic Medication Use in 2019 vs 2020

This supplemental material has been provided by the authors to give readers additional information about their work.

**eFigure.** Flowchart for 2019 and 2020 Utilization Cohorts of Medicare Beneficiaries With Severe Mental Illness in Study

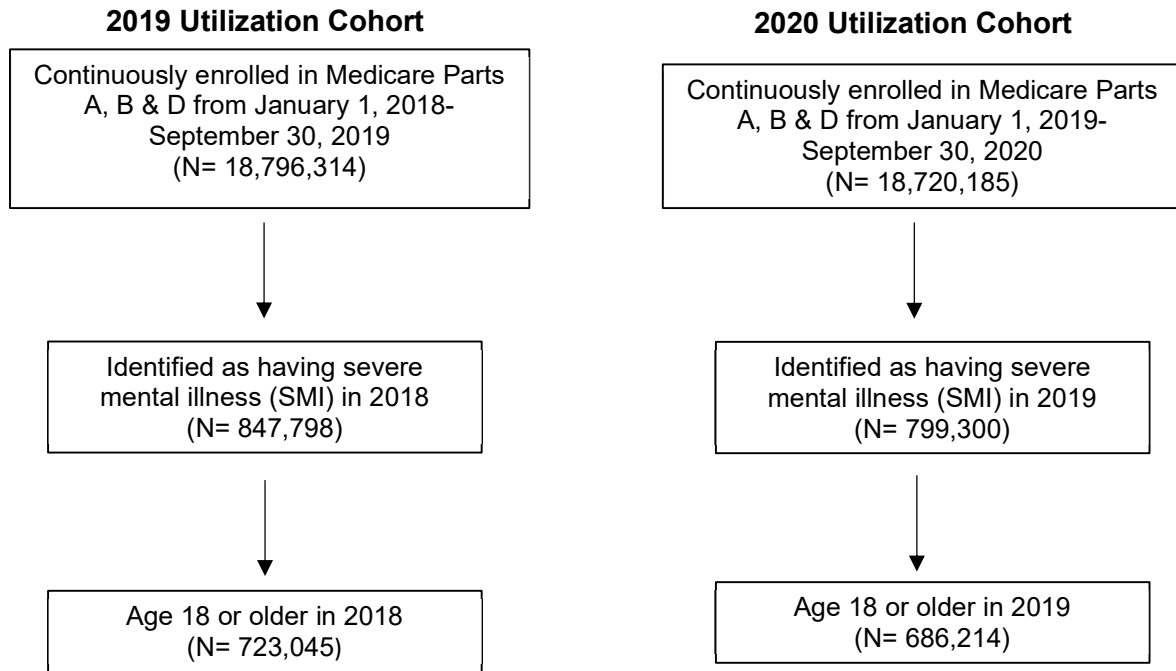

**eTable 1. Outpatient Visit Codes**

|                            | <b>MH/SUD Services Category</b>                                                          | <b>CPT/HCPCS Codes</b>                                                                                                                                                                                                                                                                                                                     |
|----------------------------|------------------------------------------------------------------------------------------|--------------------------------------------------------------------------------------------------------------------------------------------------------------------------------------------------------------------------------------------------------------------------------------------------------------------------------------------|
| Outpatient Codes           | ECT or TMS services                                                                      | 90867-90871                                                                                                                                                                                                                                                                                                                                |
|                            | Crisis intervention services                                                             | 90839, 90840, H0007, H2011, S9484, S9485, T2034                                                                                                                                                                                                                                                                                            |
|                            | Assessments, E&M services, substance use disorders medication services                   | 90791, 90792, 99058, 99201-99205, 99211-99215, 99241-99245, 99341-99345, 99347, 99350, 99495, 99496, G0155, G0175, G0463, G0466, G0467, G0469, G0470, H0001, H0002, H0014, H0016, H0020, H0022, H0023, H0031, H0034, H0038, H0046, H1011, H2000, H2010, H2027, H5030, M0064, T1007, T1011, T1015, T0123, T1040, T1041, T2010, T2011, Z0001 |
|                            | Psychotherapy services                                                                   | Individual or Family: 90832-90838, 90845, 90847-90849, 90865, 90875, 90876, 90880, 90900-90902, 90904, 90906, 90908, 90910, 99510, H0004, H2019, H2020, H2032, H5010, T1006, T1012<br>Group: 90853, 90857, H0005, H5020, H5025, S9454,                                                                                                     |
|                            | Intensive outpatient services                                                            | H0015, S9480                                                                                                                                                                                                                                                                                                                               |
|                            | Supportive psychosocial services                                                         | 97003, 97004, 99490, H0036, H0037, H0039, H0040, H2001, H2013-H2018, H2021-H2026, H2030, H2031, H5220, H5230, H5240, H5299, S9127, T1017, T2012-T2015, T2018-T2023, Z0002,                                                                                                                                                                 |
|                            | Screening and preventative counseling or services                                        | 98960-98962, 99078, 99385-99387, 99395-99397, 99401-99404, 99408, 99409, 99411, 99412, 99420, G0396, G0397, G0442, G0443, G0513-G0515, H0028, H0029, H0049, H0050.                                                                                                                                                                         |
|                            | Codes specific for telemedicine visits                                                   | Audio only: 99441-99443, 98966-98968<br>Video: G2025 or outpatient visit with modifier code (modifiers GQ, GT or 95)                                                                                                                                                                                                                       |
| Emergency Department Codes | 90500, 90510, 90515, 90517, 90520, 90530, 90540, 90550, 90560, 90570, 90580, 99281-99285 |                                                                                                                                                                                                                                                                                                                                            |

**eTable 2. Substance Use Disorder, Medical Comorbidity, and Self-injury ICD-10 Codes**

| <b>Diagnosis</b>                                                       | <b>ICD-10 Codes</b>                                                                                                                                                                                                                                                                                                                                                                                                                                                                                                                                  |
|------------------------------------------------------------------------|------------------------------------------------------------------------------------------------------------------------------------------------------------------------------------------------------------------------------------------------------------------------------------------------------------------------------------------------------------------------------------------------------------------------------------------------------------------------------------------------------------------------------------------------------|
| Intentional self-harm                                                  | R45.851, X71-X83, T14.91, T36-T65 and T71 when 6 <sup>th</sup> character of code =2.<br>Except for T36.9, T37.9, T39.9, T41.4, T42.7, T43.9, T45.9, T47.9, and T49.9, T51.9, T52.9, T53.9, T54.9, T56.9, T57.9, T58.0, T58.1, T58.9, T59.9, T60.9, T61.0, T61.1, T61.9, T62.9, T63.9, T64.0, T64.8, T65.9, which are included if the 5 <sup>th</sup> character of the code=2.                                                                                                                                                                        |
| Accidental or unclear intent overdose/poisoning by substances of abuse | R78.0 (excessive blood alcohol level)<br>OR<br>T40.0 (opium), T40.1 (heroin), T40.2 (other opioids), T40.3 (methadone), T40.4 (synthetic narcotics), T40.5 (cocaine)<br>T40.6 (unspecified narcotic), T40.7 (cannabis/derivatives), T40.8 (LSD), T40.90 (unspecified hallucinogens), T40.99 (other hallucinogens), T42.3 (barbiturates), T42.4 (benzodiazepines), T43.60 (psychostimulants), T43.62 (amphetamines), T43.63 (methylphenidate), T43.64 (ecstasy), or T43.69 (other psychostimulants), T51.0X<br>when 6 <sup>th</sup> character =1 or 4 |
| Substance use disorder                                                 | F10-F16 or F18-F19                                                                                                                                                                                                                                                                                                                                                                                                                                                                                                                                   |
| Diabetes                                                               | E08.xxx-E11.xxx, E13.xxx                                                                                                                                                                                                                                                                                                                                                                                                                                                                                                                             |
| Cardiovascular disease                                                 | Heart failure: I09.81, I11.0, I13.0, I13.2, I50.1, I50.2x, I50.3x, I50.4x, I50.81x, I50.82, I50.83, I50.84, I50.89, I50.9<br><b>OR</b><br>Ischemic heart disease: I20.xxx-I25.xxx                                                                                                                                                                                                                                                                                                                                                                    |
| Hypertension                                                           | H35.031, H35.032, H35.033, H35.039, I10, I11.0, I11.9, I12.0, I12.9, I13.0, I13.1x, I13.2, I15.x, I67.4, N26.2                                                                                                                                                                                                                                                                                                                                                                                                                                       |
| Chronic lung problems                                                  | Asthma: J45.2xx-J45.5xx, J45.9xx<br><b>OR</b><br>COPD: J40.xx-J44.xx, J47.xx                                                                                                                                                                                                                                                                                                                                                                                                                                                                         |

**eTable 3. Weekly Number and Percentage of Outpatient Mental Health Visits in 2020 Conducted by Telemedicine and by Type of Telemedicine**

| Calendar Weeks in 2020 | N of Outpatient Visits (in-person and telemedicine) | Mental health telemedicine visit (any type) |                        | Mental health telemedicine video visit |                        | Mental health telemedicine audio only visit |                        |
|------------------------|-----------------------------------------------------|---------------------------------------------|------------------------|----------------------------------------|------------------------|---------------------------------------------|------------------------|
|                        |                                                     | N                                           | % of outpatient visits | N                                      | % of outpatient visits | N                                           | % of outpatient visits |
| 4-7                    | 439,095                                             | 10,027                                      | 2.3                    | 9,988                                  | 2.3                    | 50                                          | 0.01                   |
| 8-11                   | 431,126                                             | 14,445                                      | 3.4                    | 14,334                                 | 3.3                    | 129                                         | 0.03                   |
| 12-15                  | 334,880                                             | 160,187                                     | 47.8                   | 139,797                                | 41.7                   | 20,960                                      | 6.3                    |
| 16-19                  | 391,457                                             | 255,201                                     | 65.2                   | 220,513                                | 56.3                   | 35,687                                      | 9.1                    |
| 20-23                  | 395,911                                             | 247,011                                     | 62.4                   | 215,963                                | 54.5                   | 32,193                                      | 8.1                    |
| 24-27                  | 393,963                                             | 225,864                                     | 57.3                   | 199,225                                | 50.6                   | 27,799                                      | 7.1                    |
| 28-31                  | 411,259                                             | 229,262                                     | 55.8                   | 203,464                                | 49.5                   | 27,014                                      | 6.6                    |
| 32-35                  | 413,035                                             | 225,011                                     | 54.5                   | 200,204                                | 48.5                   | 25,958                                      | 6.3                    |

Notes: (1) Unadjusted analyses. (2) Federal COVID-10 pandemic emergency declaration began week 12 of 2020.

**eTable 4. Outpatient Mental Health Utilization in 2019 vs 2020**

|                    | 2019<br>N=723045 |             | 2020<br>N=686214 |             | Percentage point<br>difference (95%<br>CI) | % Relative<br>change in<br>2020<br>compared to<br>2019 |
|--------------------|------------------|-------------|------------------|-------------|--------------------------------------------|--------------------------------------------------------|
|                    | N                | %           | N                | %           |                                            |                                                        |
| Week 4-7           | 257,782          | 35.7        | 250,350          | 36.5        | 0.8 (0.7, 1.0)                             | 2.3                                                    |
| Week 8-11          | 264,197          | 36.5        | 245,723          | 35.8        | -0.7 (-0.9, -0.6)                          | -2.0                                                   |
| Weeks 12-15        | 265,169          | 36.7        | 200,590          | 29.2        | -7.4 (-7.6, -7.3)                          | -20.3                                                  |
| Weeks 16-19        | 264,819          | 36.6        | 225,825          | 32.9        | -3.7 (-3.9, -3.6)                          | -10.2                                                  |
| Weeks 20-23        | 254,550          | 35.2        | 228,525          | 33.3        | -1.9 (-2.1, -1.8)                          | -5.4                                                   |
| Weeks 24-27        | 249,158          | 34.5        | 228,074          | 33.2        | -1.2 (-1.4, -1.1)                          | -3.6                                                   |
| Weeks 28-31        | 260,667          | 36.1        | 237,558          | 34.6        | -1.4 (-1.6, -1.3)                          | -4.0                                                   |
| Weeks 32-35        | 257,311          | 35.6        | 239,492          | 34.9        | -0.7 (-0.8, -0.53)                         | -1.9                                                   |
| Weeks 36-39        | 253,446          | 35.1        | 234,618          | 34.2        | -0.9 (-1.0, -0.7)                          | -2.5                                                   |
| <b>Weeks 12-25</b> | <b>466,379</b>   | <b>64.5</b> | <b>402,065</b>   | <b>58.6</b> | <b>-5.9 (-6.1, -5.8)</b>                   | <b>-9.1</b>                                            |
| <b>Weeks 26-39</b> | <b>456,048</b>   | <b>63.1</b> | <b>414,752</b>   | <b>60.4</b> | <b>-2.6 (-2.8, -2.5)</b>                   | <b>-4.2</b>                                            |
| <b>Weeks 12-39</b> | <b>536,520</b>   | <b>74.2</b> | <b>483,458</b>   | <b>70.5</b> | <b>-3.8 (-3.9, -3.6)</b>                   | <b>-5.1</b>                                            |

Notes: (1) Having at least one outpatient mental health visit during the observation interval. (2) Unadjusted analyses. (3) Week 1 in 2020 is one day shorter than week 1 in 2019 due to January 1<sup>st</sup> 2019 vs. 2020 start dates. Therefore, estimates begin with weeks 4-7.

**eTable 5. Specific Types of Outpatient Mental Health Utilization in 2019 vs 2020**

|                                     | 2019<br>N=723045 |          | 2020<br>N=686214 |          | Percentage Point<br>Difference<br>(95% CI) | %<br>Relative<br>change in<br>2020<br>compared<br>to 2019 |
|-------------------------------------|------------------|----------|------------------|----------|--------------------------------------------|-----------------------------------------------------------|
|                                     | N                | %        | N                | %        |                                            |                                                           |
| <b>Individual or Family therapy</b> |                  |          |                  |          |                                            |                                                           |
| Week 4-7                            | 111,156          | 15.37    | 108,139          | 15.76    | 0.39 (-0.51, -0.27)                        | 2.5                                                       |
| Week 8-11                           | 114,385          | 15.82    | 107,803          | 15.71    | -0.11 (-0.23, 0.01)                        | -0.7                                                      |
| Weeks 12-15                         | 116,410          | 16.10    | 88,210           | 12.85    | -3.25 (-3.36, -3.13)                       | -20.2                                                     |
| Weeks 16-19                         | 115,419          | 15.96    | 93,474           | 13.62    | -2.34 (-2.46, -2.22)                       | -14.7                                                     |
| Weeks 20-23                         | 111,680          | 15.45    | 95,189           | 13.87    | -1.57 (-1.69, -1.46)                       | -10.2                                                     |
| Weeks 24-27                         | 109,645          | 15.16    | 95,226           | 13.88    | -1.29 (-1.40, -1.17)                       | -8.4                                                      |
| Weeks 28-31                         | 112,720          | 15.59    | 97,246           | 14.17    | -1.42 (-1.54, -1.30)                       | -9.1                                                      |
| Weeks 32-35                         | 112,043          | 15.50    | 100,301          | 14.62    | -.88 (-1.00, -0.76)                        | -5.7                                                      |
| Weeks 36-39                         | 111,080          | 15.36    | 97,707           | 14.24    | -1.12 (-1.24, -1.01)                       | -7.3                                                      |
|                                     |                  |          |                  |          |                                            |                                                           |
| <b>Group therapy</b>                | <b>N</b>         | <b>%</b> | <b>N</b>         | <b>%</b> |                                            |                                                           |
| Week 4-7                            | 12,025           | 1.66     | 10,905           | 1.59     | -0.07 (-0.12, -0.03)                       | -4.2                                                      |
| Week 8-11                           | 12,288           | 1.70     | 10,618           | 1.55     | -0.15 (-0.19, -0.11)                       | -8.8                                                      |
| Weeks 12-15                         | 12,400           | 1.71     | 3,823            | 0.56     | -1.16 (-1.19, -1.12)                       | -67.3                                                     |
| Weeks 16-19                         | 12,007           | 1.66     | 3,446            | 0.50     | -1.16 (-1.19, -1.12)                       | -69.9                                                     |
| Weeks 20-23                         | 11,396           | 1.58     | 4,135            | 0.60     | -0.97 (-1.01, -0.94)                       | -62.0                                                     |
| Weeks 24-27                         | 11,080           | 1.53     | 4,324            | 0.63     | -0.90 (-0.94, -0.87)                       | -58.8                                                     |
| Weeks 28-31                         | 10,777           | 1.49     | 4,153            | 0.61     | -0.89 (-0.92, -0.85)                       | -59.1                                                     |
| Weeks 32-35                         | 9,397            | 1.30     | 4,868            | 0.71     | -0.59 (-0.62, -0.59)                       | -45.4                                                     |
| Weeks 36-39                         | 11,275           | 1.56     | 5,442            | 0.79     | -0.77 (-0.80, -0.73)                       | -49.4                                                     |
|                                     |                  |          |                  |          |                                            |                                                           |
| <b>ECT</b>                          | <b>N</b>         | <b>%</b> | <b>N</b>         | <b>%</b> |                                            |                                                           |
| Week 4-7                            | 1,546            | 0.21     | 1,475            | 0.21     | 0.001 (-0.014, 0.016)                      | 0.0                                                       |
| Week 8-11                           | 1,572            | 0.22     | 1,472            | 0.21     | -0.003 (-0.018, -0.012)                    | -4.5                                                      |
| Weeks 12-15                         | 1,542            | 0.21     | 933              | 0.14     | -0.08 (-0.09, -0.06)                       | -33.3                                                     |
| Weeks 16-19                         | 1,537            | 0.21     | 890              | 0.13     | -0.08 (-0.10, -0.07)                       | -38.1                                                     |
| Weeks 20-23                         | 1,482            | 0.20     | 1,069            | 0.16     | -0.05 (-0.06, -0.04)                       | -20.0                                                     |
| Weeks 24-27                         | 1,491            | 0.21     | 1,103            | 0.16     | -0.05 (-0.06, -0.03)                       | -23.8                                                     |
| Weeks 28-31                         | 1,465            | 0.20     | 1,152            | 0.17     | -0.03 (-0.05, -0.02)                       | -15.0                                                     |
| Weeks 32-35                         | 1,491            | 0.21     | 1,175            | 0.17     | -0.03 (0.05, -0.02)                        | -19.0                                                     |
| Weeks 36-39                         | 1,499            | 0.21     | 1,151            | 0.17     | -0.04 (-0.05, -0.03)                       | -19.0                                                     |

Notes: (1) Having at least one outpatient mental health visit (by type) during the observation interval. (2) Unadjusted analyses. (3) Week 1 in 2020 is one day shorter than week 1 in 2019 due to January 1<sup>st</sup> 2019 vs. 2020 start dates. Therefore, estimates begin with weeks 4-7.

**eTable 6. Mental Health Emergency Department Visit, Hospital Admission, or Oral Antipsychotic Medication Use in 2019 vs 2020**

|                                       | 2019<br>N=723045 |          | 2020<br>N=686214 |          | Percentage Point<br>Difference (95%<br>CI) | % Relative<br>change in<br>2020<br>compared<br>to 2019 |
|---------------------------------------|------------------|----------|------------------|----------|--------------------------------------------|--------------------------------------------------------|
| <b>ED Visit</b>                       | <b>N</b>         | <b>%</b> | <b>N</b>         | <b>%</b> |                                            |                                                        |
| Week 4-7                              | 11969            | 1.7      | 11102            | 1.6      | -0.04 (-0.08, -0.00)                       | -2.3                                                   |
| Week 8-11                             | 12063            | 1.7      | 11001            | 1.6      | -0.07 (-0.11, -0.02)                       | -3.9                                                   |
| Weeks 12-15                           | 12383            | 1.7      | 8503             | 1.2      | -0.47 (-0.51, -0.43)                       | -27.6                                                  |
| Weeks 16-19                           | 12440            | 1.7      | 8710             | 1.3      | -0.45 (-0.49, -0.41)                       | -26.2                                                  |
| Weeks 20-23                           | 12545            | 1.7      | 9601             | 1.4      | -0.34 (-0.38, 0.-29)                       | -19.4                                                  |
| Weeks 24-27                           | 12390            | 1.7      | 10031            | 1.5      | -0.25 (-0.29, -0.21)                       | -14.7                                                  |
| Weeks 28-31                           | 12591            | 1.7      | 10134            | 1.5      | -0.26 (-0.31, -0.22)                       | -15.2                                                  |
| Weeks 32-35                           | 12428            | 1.7      | 10274            | 1.5      | -0.22 (-0.26, -0.18)                       | -12.9                                                  |
| Weeks 36-39                           | 12300            | 1.7      | 10033            | 1.5      | -0.24 (-0.28, -0.20)                       | -14.1                                                  |
|                                       |                  |          |                  |          |                                            |                                                        |
| <b>Hospitalization</b>                | <b>N</b>         | <b>%</b> | <b>N</b>         | <b>%</b> |                                            |                                                        |
| Week 4-7                              | 11630            | 1.6      | 10573            | 1.5      | -0.07 (-0.11, -0.03)                       | -4.2                                                   |
| Week 8-11                             | 11063            | 1.5      | 10142            | 1.5      | 0.-05 (-0.09, -0.01)                       | -3.4                                                   |
| Weeks 12-15                           | 11564            | 1.6      | 7912             | 1.2      | -0.45 (-0.48, -0.41)                       | -27.9                                                  |
| Weeks 16-19                           | 11244            | 1.6      | 8204             | 1.2      | -0.36 (-0.41, -0.32)                       | -23.1                                                  |
| Weeks 20-23                           | 11063            | 1.5      | 8854             | 1.3      | -0.24 (-0.28, -0.20)                       | -15.7                                                  |
| Weeks 24-27                           | 11121            | 1.5      | 9173             | 1.3      | -0.20 (-0.24, -0.16)                       | -13.1                                                  |
| Weeks 28-31                           | 11227            | 1.6      | 9064             | 1.3      | -0.23 (-0.27, -0.19)                       | -14.9                                                  |
| Weeks 32-35                           | 10750            | 1.5      | 8933             | 1.3      | -0.18 (-0.22, -0.15)                       | -12.4                                                  |
|                                       |                  |          |                  |          |                                            |                                                        |
| <b>Oral Antipsychotic Medications</b> | <b>N</b>         | <b>%</b> | <b>N</b>         | <b>%</b> |                                            |                                                        |
| Week 4-7                              | 190,501          | 26.3     | 181,631          | 26.5     | 0.12 (-0.27, 0.02)                         | 0.5                                                    |
| Week 8-11                             | 210,472          | 29.1     | 194,248          | 28.3     | -0.80 (-0.95, -0.65)                       | -2.8                                                   |
| Weeks 12-15                           | 216,468          | 29.9     | 163,796          | 23.9     | -6.07 (-6.21, -5.92)                       | -20.3                                                  |
| Weeks 16-19                           | 217,156          | 30.0     | 185,346          | 27.0     | -3.02 (-3.17, -2.87)                       | -10.1                                                  |
| Weeks 20-23                           | 208,812          | 28.9     | 187,223          | 27.3     | -1.60 (-1.74, -1.45)                       | -5.5                                                   |
| Weeks 24-27                           | 204,272          | 28.3     | 186,168          | 27.1     | -1.12 (-1.27, -0.97)                       | -4.0                                                   |
| Weeks 28-31                           | 213,141          | 29.5     | 193,222          | 28.2     | -1.32 (-1.47, -1.17)                       | -4.5                                                   |
| Weeks 32-35                           | 211,044          | 29.2     | 194,913          | 28.4     | -0.78 (-0.93, -0.63)                       | -2.7                                                   |
| Weeks 36-39                           | 207,686          | 28.7     | 190,448          | 27.8     | -0.97 (-1.12, -0.82)                       | -3.4                                                   |

Notes: (1) Having at least one outpatient mental health visit during the observation interval. (2) Unadjusted analyses. (3) Week 1 in 2020 is one day shorter than week 1 in 2019 due to January 1<sup>st</sup> 2019 vs. 2020 start dates. Therefore, estimates begin with weeks 4-7.
